# Supplementary material for: Microbial Degradation of Rubber: Actinobacteria
Source: MDPI journal article supplement (doi:10.3390/polym13121989), 2021-06-17
Supplement: s1 [file s1]

Supplementary Table 1. Details of Isolation Source for Actinobacteria containing *lcp* gene in GenBank

| GenBank Accession Number and strain                   | Genus                    | Country      | Isolation Source                                        | Source Group    |
|-------------------------------------------------------|--------------------------|--------------|---------------------------------------------------------|-----------------|
| CRL78180 Mycolicibacterium malmesburyense             | <i>Mycolicibacterium</i> | South Africa | Bos taurus                                              | animal          |
| ON152208 Streptomyces sp. IB2014 011-1                | <i>Streptomyces</i>      | Russia       | Trichoptera larvae, lake water                          | animal          |
| OCH81255 Gordonia sp. UCD-TK1                         | <i>Gordonia</i>          | USA          | Ambulatory Surgery Center                               | clinical sample |
| PEH75252 Nocardia sp. FDAARGOS_372                    | <i>Nocardia</i>          | USA          | Human clinical isolate                                  | clinical sample |
| OCF84162 Nocardia brasiliensis                        | <i>Nocardia</i>          | Mexico       | Human pathogen                                          | clinical sample |
| OXR45130 Nocardia cerradoensis                        | <i>Nocardia</i>          | Spain        | Human knee abscess                                      | clinical sample |
| AFU00935 Nocardia brasiliensis ATCC 700358            | <i>Nocardia</i>          | Mexico       | Mycetoma of thorax, human lungs                         | clinical sample |
| SLL22258 Mycobacteroides abscessus subsp. Massiliense | <i>Mycobacteroides</i>   | Australia    | Human respiratory system                                | clinical sample |
| SLF86799 Mycobacteroides abscessus subsp. Massiliense | <i>Mycobacteroides</i>   | Denmark      | Human respiratory system                                | clinical sample |
| SKY95784 Mycobacteroides abscessus subsp. Abscessus   | <i>Mycobacteroides</i>   | UK           | Human respiratory system                                | clinical sample |
| SKN73727 Mycobacteroides abscessus subsp. Bolletii    | <i>Mycobacteroides</i>   | UK           | Human respiratory system                                | clinical sample |
| CNG21174 Mycobacterium tuberculosis                   | <i>Mycobacterium</i>     | South Africa | Human sputum                                            | clinical sample |
| PFX10478 Nocardia farcinica                           | <i>Nocardia</i>          | Spain        | Human sputum                                            | clinical sample |
| PFX05208 Nocardia farcinica                           | <i>Nocardia</i>          | Spain        | Human sputum                                            | clinical sample |
| KRC69836 Nocardioides sp. Root240                     | <i>Nocardioides</i>      | Germany      | <i>Arabidopsis thaliana</i> leaf                        | plant           |
| KRC46491 Nocardioides sp. Root79                      | <i>Nocardioides</i>      | Germany      | <i>Arabidopsis thaliana</i> leaf                        | plant           |
| KRA92165 Nocardioides sp. Root682                     | <i>Nocardioides</i>      | Germany      | <i>Arabidopsis thaliana</i> leaf                        | plant           |
| KRA38205 Nocardioides sp. Root614                     | <i>Nocardioides</i>      | Germany      | <i>Arabidopsis thaliana</i> leaf                        | plant           |
| KQZ17413 Streptomyces sp. Root55                      | <i>Streptomyces</i>      | Germany      | <i>Arabidopsis thaliana</i> leaf                        | plant           |
| KQY32086 Nocardia sp. Root136                         | <i>Nocardia</i>          | Germany      | <i>Arabidopsis thaliana</i> leaf                        | plant           |
| KQX92924 Streptomyces sp. Root1319                    | <i>Streptomyces</i>      | Germany      | <i>Arabidopsis thaliana</i> leaf                        | plant           |
| KQX77141 Streptomyces sp. Root1310                    | <i>Streptomyces</i>      | Germany      | <i>Arabidopsis thaliana</i> leaf                        | plant           |
| KQP68985 Microbacterium sp. Leaf288                   | <i>Microbacterium</i>    | Switzerland  | <i>Arabidopsis thaliana</i> leaf                        | plant           |
| ONH62053 Frankia sp. Ccl49                            | <i>Frankia</i>           | Egypt        | <i>Casuarina cunninghamiana</i> root nodule             | plant           |
| KPM56518 Frankia sp. R43                              | <i>Frankia</i>           | USA          | <i>Casuarina equisetifolia</i> root                     | plant           |
| ALG08537 Kibdelosporangium phytohabitans              | <i>Kibdelosporangium</i> | China        | Inner tissue of medical plant <i>Jatropha curcas</i> L. | plant           |
| ALG08536 Kibdelosporangium phytohabitans              | <i>Kibdelosporangium</i> | China        | Inner tissue of medical plant <i>Jatropha curcas</i> L. | plant           |
| ALC27020 Streptomyces sp. CFMR 7                      | <i>Streptomyces</i>      | Malaysia     | Latex                                                   | plant           |
| ONH29850 Frankia asymbiotica                          | <i>Frankia</i>           | USA          | <i>Morella californica</i> root                         | plant           |
| PNE14597 Amycolatopsis sp. BJA-103                    | <i>Amycolatopsis</i>     | China        | <i>Valeriana jatamansi</i> rhizomes                     | plant           |
| PSK59749 Streptomyces sp. 111WW2                      | <i>Streptomyces</i>      | Australia    | Wheat plant root                                        | plant           |
| CQR65882 Streptomyces leeuwenhoekii                   | <i>Streptomyces</i>      | USA          | Atacama Desert                                          | soil            |
| OSY35358 Pseudonocardia autotrophica                  | <i>Pseudonocardia</i>    | Tokyo        | Atmospheric dust                                        | soil            |
| QBI55540 Streptomonospora sp. M2                      | <i>Streptomonospora</i>  | Germany      | Beach sand                                              | soil            |
| ONI75193 Actinosynnema sp. ALI-1.44                   | <i>Actinosynnema</i>     | USA          | Chitin enrichment of biocrust soil                      | soil            |
| KZB79768 Amycolatopsis regifaucium                    | <i>Amycolatopsis</i>     | Australia    | Composite arid soil                                     | soil            |
| PWD44862 Gordonia paraffinivorans                     | <i>Gordonia</i>          | Brazil       | Compost                                                 | soil            |

|                                                           |                          |              |                               |      |
|-----------------------------------------------------------|--------------------------|--------------|-------------------------------|------|
| CRK51342 Rhodococcus sp. RD6.2                            | <i>Rhodococcus</i>       | portugal     | Estuary sediment              | soil |
| KOX08038 Micromonospora sp. NRRL B-16802                  | <i>Micromonospora</i>    | USA          | Field soil                    | soil |
| ALV53416 Streptomyces sp. 4F                              | <i>Streptomyces</i>      | China        | Garden soil                   | soil |
| OUC99979 Streptosporangium minutum                        | <i>Streptosporangium</i> | South Africa | Garden soil                   | soil |
| OXM65930 Amycolatopsis vastitatis H5                      | <i>Amycolatopsis</i>     | Chile        | Gravel soil                   | soil |
| OXM72510 Amycolatopsis sp. KNN50.9b                       | <i>Amycolatopsis</i>     | Chile        | Halite encrusted soil         | soil |
| OUC76591 Gordonia lacunae                                 | <i>Gordonia</i>          | South Africa | Lagoon sediment               | soil |
| KHL16074 Mumia flava                                      | <i>Mumia</i>             | Malaysia     | Mangrove                      | soil |
| KSU58520 Gordonia sp. SGD-V-85                            | <i>Gordonia</i>          | India        | Marine sediment               | soil |
| ASR34495 Prauserella marina                               | <i>Prauserella</i>       | China        | Ocean sediment                | soil |
| PBC43470 Rhodococcus sp. ACPA4                            | <i>Rhodococcus</i>       | Norwich      | Populus alba organic material | soil |
| PJN11143 Streptomyces sp. CB01635                         | <i>Streptomyces</i>      | China        | Primary forest soil           | soil |
| ARF65131 Streptomyces violaceoruber                       | <i>Streptomyces</i>      | China        | Seabed sludge                 | soil |
| OPX10399 Gordonia sp. i37                                 | <i>Gordonia</i>          | UK           | Sediment                      | soil |
| EPJ42703 Streptomyces afghaniensis 772                    | <i>Streptomyces</i>      | Afghanistan  | Soil                          | soil |
| ASO21239 Actinoalloteichus hoggarensis                    | <i>Actinoalloteichus</i> | Algeria      | Soil                          | soil |
| ETD33503 Williamsia sp. D3                                | <i>Williamsia</i>        | Antartica    | Soil                          | soil |
| OZG29444 Williamsia sp. 1138                              | <i>Williamsia</i>        | Australia    | Soil                          | soil |
| ORM38330 Williamsia sp. 1135                              | <i>Williamsia</i>        | Australia    | Soil                          | soil |
| ASU58405 Nocardiopsis dassonvillei                        | <i>Nocardiopsis</i>      | China        | Soil                          | soil |
| ORT56729 Streptomyces sp. CB03238                         | <i>Streptomyces</i>      | China        | Soil                          | soil |
| ANN18395 Amycolatopsis orientalis                         | <i>Amycolatopsis</i>     | China        | Soil                          | soil |
| ETA06949 Gordonia alkanivorans CGMCC 6845                 | <i>Gordonia</i>          | China        | Soil                          | soil |
| EPH43136 Streptomyces aurantiacus JA 4570                 | <i>Streptomyces</i>      | China        | Soil                          | soil |
| ATE55850 Actinosynnema pretiosum                          | <i>Actinosynnema</i>     | China        | Soil                          | soil |
| ASR04442 Gordonia rubripertincta                          | <i>Gordonia</i>          | Germany      | Soil                          | soil |
| AQZ62882 Nonomuraea sp. ATCC 55076                        | <i>Nonomuraea</i>        | India        | Soil                          | soil |
| OLZ43780 Amycolatopsis keratiniphila subsp. Nogabecina    | <i>Amycolatopsis</i>     | India        | Soil                          | soil |
| KSZ58500 Rhodococcus pyridinivorans KG-16                 | <i>Rhodococcus</i>       | India        | Soil                          | soil |
| QBQ62622 Saccharomonospora sp. 31sw                       | <i>Saccharomonospora</i> | Iran         | Soil                          | soil |
| AIG75424 Amycolatopsis japonica                           | <i>Amycolatopsis</i>     | Japan        | Soil                          | soil |
| OOC01227 Amycolatopsis azurea DSM 43854                   | <i>Amycolatopsis</i>     | Japan        | Soil                          | soil |
| ONF70734 Amycolatopsis keratiniphila subsp. keratiniphila | <i>Amycolatopsis</i>     | Kuwait       | Soil                          | soil |
| OZV81504 Micromonospora echinospora                       | <i>Micromonospora</i>    | Netherlands  | Soil                          | soil |
| OLT11829 Actinomadura sp. CNU-125                         | <i>Actinomadura</i>      | Palau        | Soil                          | soil |
| OXM50056 Amycolatopsis thailandensis                      | <i>Amycolatopsis</i>     | Thailand     | Soil                          | soil |
| KKD10502 Streptomyces sp. WM6391                          | <i>Streptomyces</i>      | USA          | Soil                          | soil |
| KOV29961 Streptomyces sp. XY152                           | <i>Streptomyces</i>      | USA          | Soil                          | soil |
| KOU51254 Streptomyces sp. MMG1522                         | <i>Streptomyces</i>      | USA          | Soil                          | soil |
| KHD76934 Actinoplanes utahensis                           | <i>Actinoplanes</i>      | USA          | Soil                          | soil |
| OWY81865 Rhodococcus sp. BUPNP1                           | <i>Rhodococcus</i>       | India        | Soil, landfill site           | soil |
| KOY49117 Gordonia sp. NB4-1Y                              | <i>Gordonia</i>          | Canada       | Vermicompost                  | soil |
| AUA08008 Streptomyces sp. M56                             | <i>Streptomyces</i>      | South Africa | Fungus growing termite nest   | soil |

|                                        |                         |         |                              |       |
|----------------------------------------|-------------------------|---------|------------------------------|-------|
| TEA08347 Mycobacteroides salmoniphilum | <i>Mycobacteroides</i>  | Sweden  | Drinking water               | water |
| AJT42459 Psychromicrobium lacuslunae   | <i>Psychromicrobium</i> | India   | Lake surface water           | water |
| OQR65661 Streptomyces sp. B9173        | <i>Streptomyces</i>     | Germany | Ocean                        | water |
| OHX07254 Micromonospora sp. WMMB235    | <i>Micromonospora</i>   | USA     | Ocean water                  | water |
| ODA69298 Streptomyces sp. AVP053U2     | <i>Streptomyces</i>     | USA     | Shallow water marine harbour | water |
| KHJ70360 Rhodococcus sp. Chr-9         | <i>Rhodococcus</i>      | China   | Tannery wastewater           | water |
